# Supplementary material
Source: MDPI journal article supplement (https://www.mdpi.com/2071-1050/13/5/2934)
Supplement: s1 [file s1]

Supplementary material

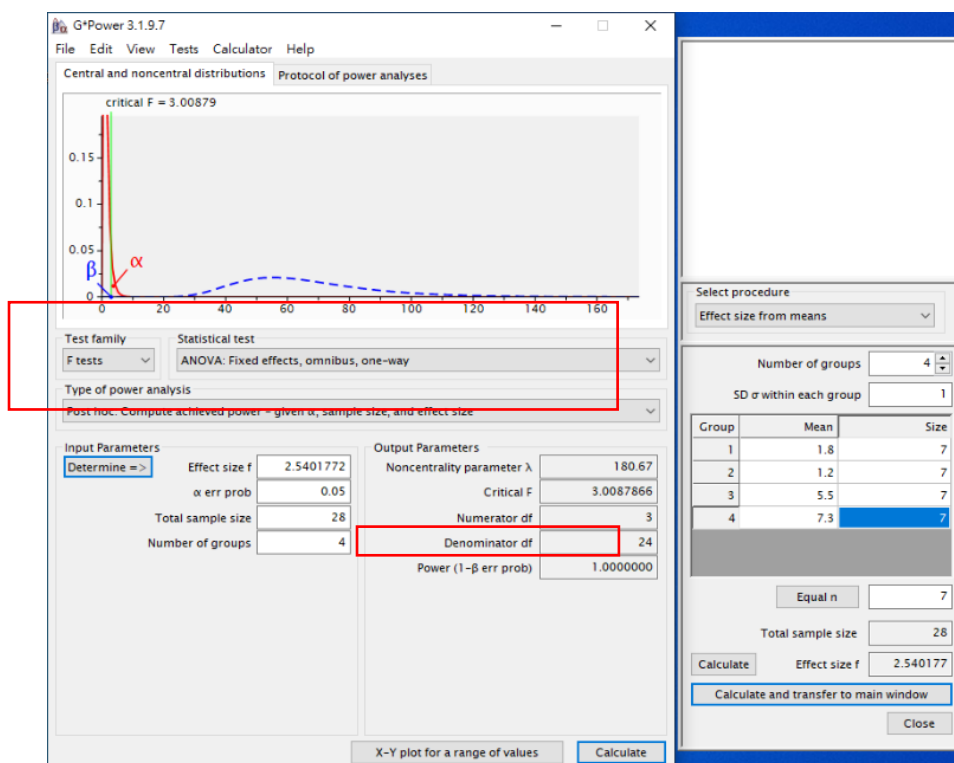

(a)

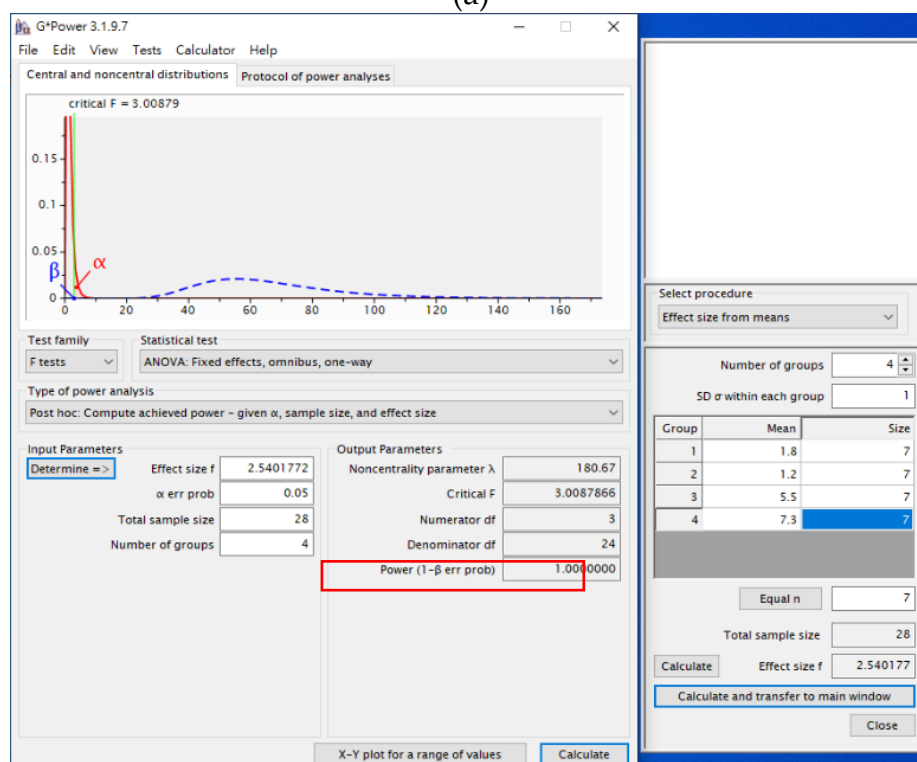

(b)

**Figure S1.** The examination of statistical power from the data shown in Table 1. (a) The value of Power is 1 for the data along the ML direction (b) The value of Power is 1 for the data along the AP direction.

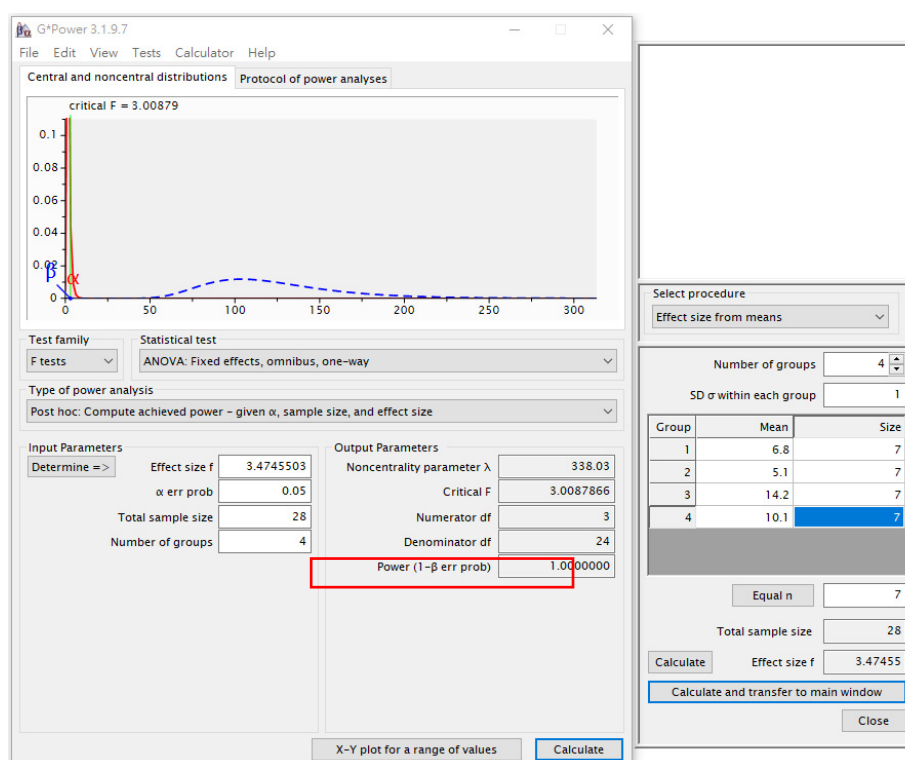

(a)

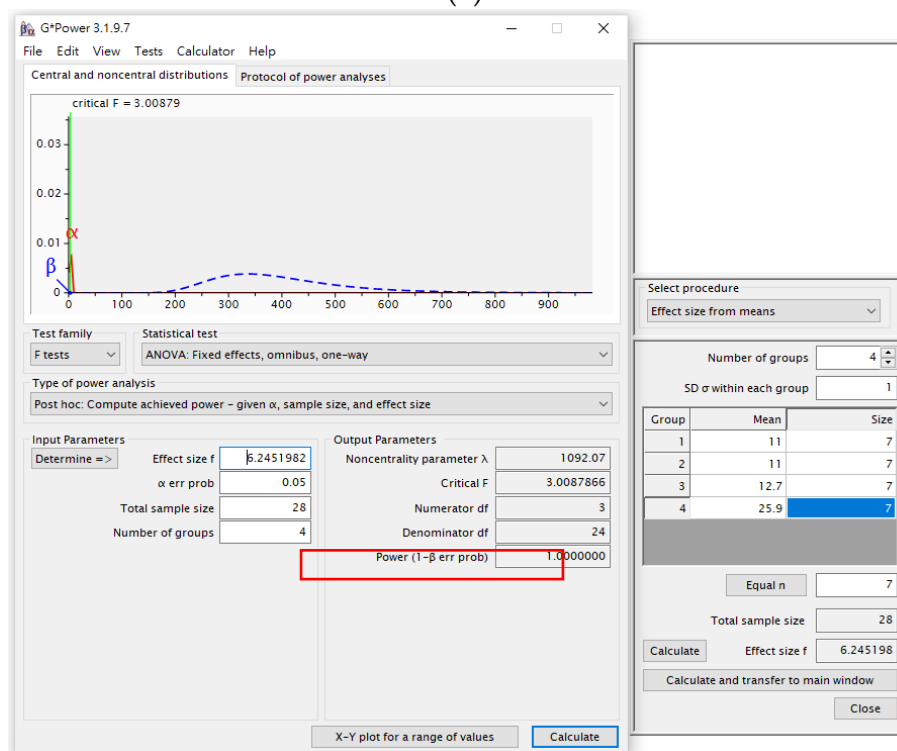

(b)

**Figure S2.** The examination of statistical power from the data shown in Table 2. (a) The value of Power is 1 for the data along the ML direction (b) The value of Power is 1 for the data along the AP direction.

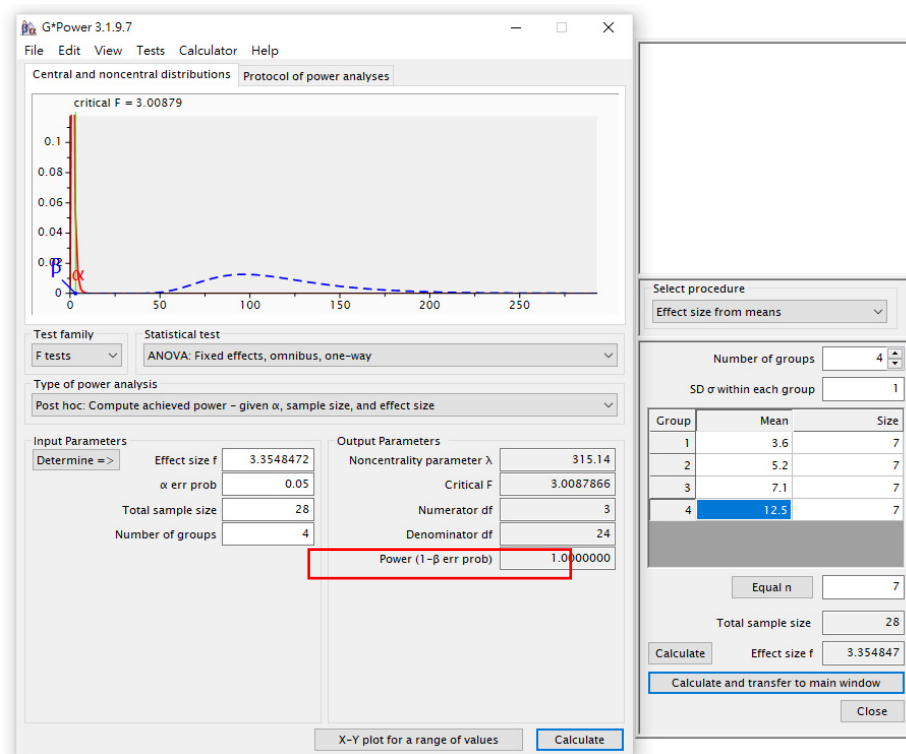

(a)

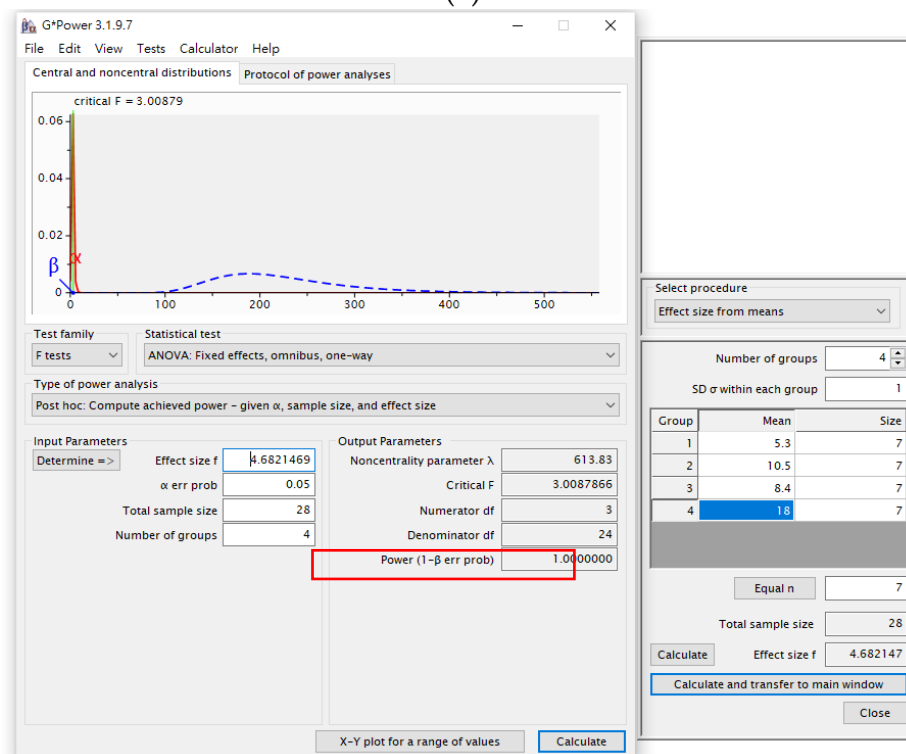

(b)

**Figure S3.** The examination of statistical power from the data shown in Table 3. (a) The value of Power is 1 for the data along the ML direction (b) The value of Power is 1 for the data along the AP direction.

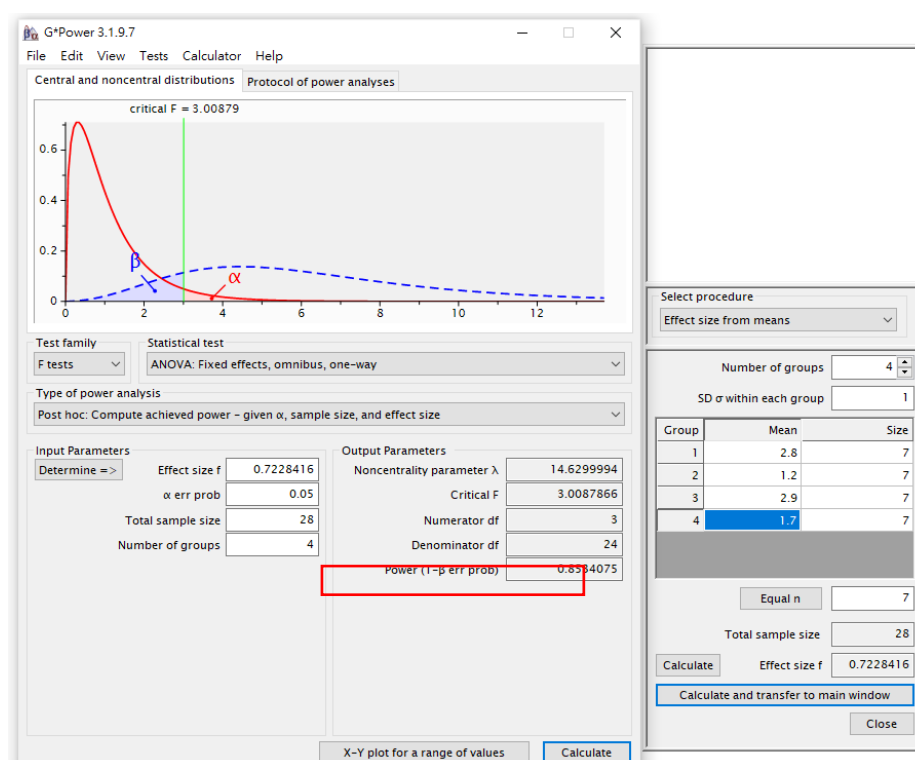

(a)

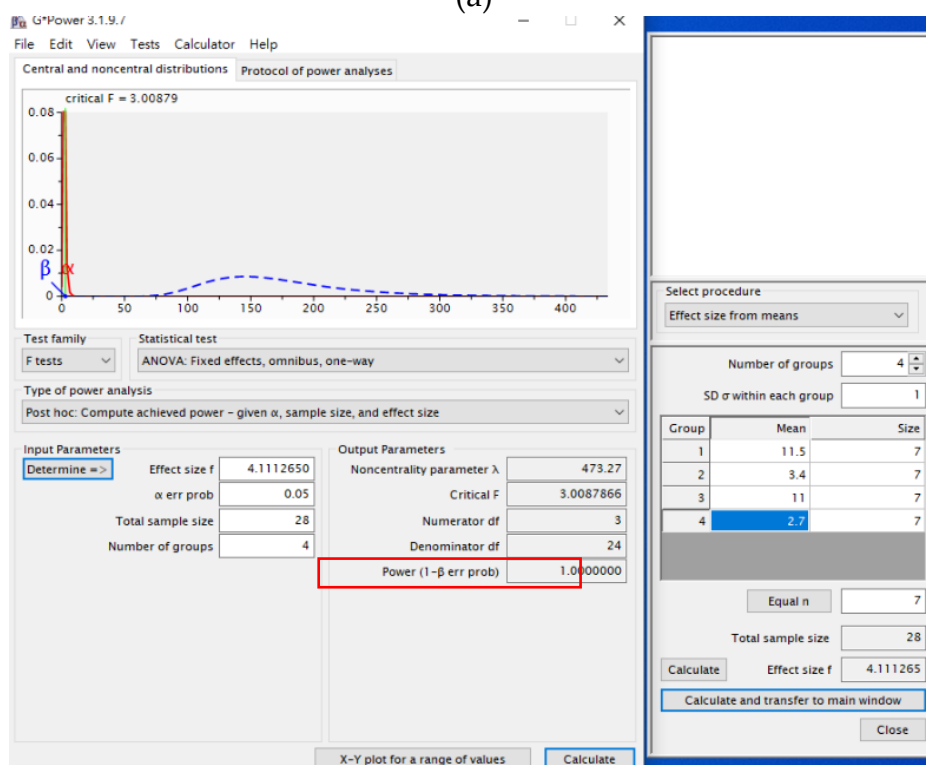

(b)

**Figure S4.** The examination of statistical power from the data shown in Table 4. (a) The value of Power is 0.85 for the data along the ML direction (b) The value of Power is 1 for the data along the AP direction.

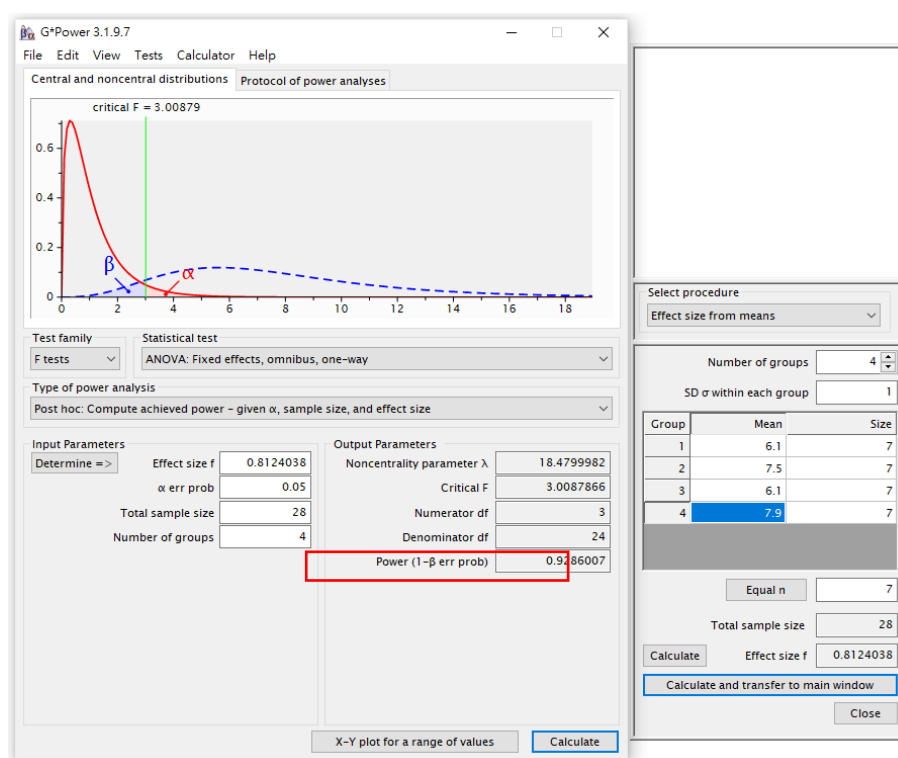

(a)

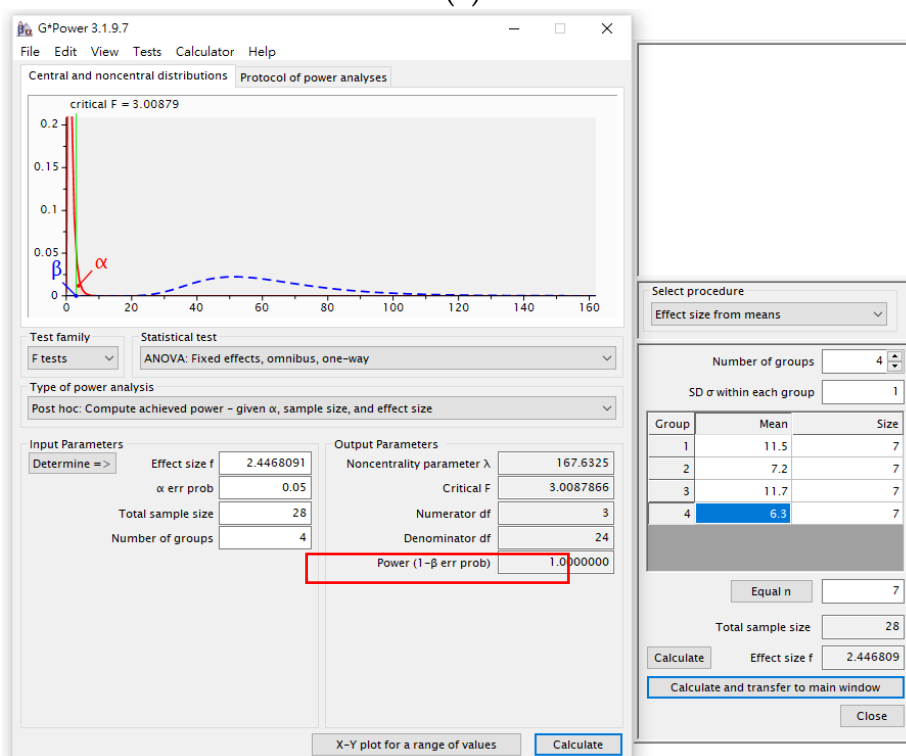

(b)

**Figure S5.** The examination of statistical power from the data shown in Table 6. (a) The value of Power is 0.93 for the data along the ML direction (b) The value of Power is 1 for the data along the AP direction.

**Table 1.** The specifications of the pressure sensing insole.

| <b>Pressure array sensor</b> |                                                                                                                                                                                     |
|------------------------------|-------------------------------------------------------------------------------------------------------------------------------------------------------------------------------------|
| Number of sensor             | 89 (insole)                                                                                                                                                                         |
| Area of sensor               | Dia. 1 cm                                                                                                                                                                           |
| Pattern of sensor            | Circle                                                                                                                                                                              |
| Thickness of sensor size     | < 300 $\mu$ m                                                                                                                                                                       |
| Range                        | 0~140 psi                                                                                                                                                                           |
| Resolution                   | 2% full scale                                                                                                                                                                       |
| Hysteresis                   | $\pm$ 8% full scale                                                                                                                                                                 |
| Acceleration sensor (option) | Digital-output X-, Y-, and Z-axis accelerometer with a programmable full scale range of $\pm$ 2g, $\pm$ 4g, $\pm$ 8g and $\pm$ 16 g and integrated 16-bit ADCs                      |
| Gyro sensor (option)         | Digital-output X-, Y-, and Z-axis angular rate sensors with a user-programmable full scale range of $\pm$ 250, $\pm$ 500, $\pm$ 1000, and $\pm$ 2000°/sec and integrated 16-bit ADC |
| Array scanning frequency     | ~30 Hz                                                                                                                                                                              |
| Power consumption            | < 100 mA                                                                                                                                                                            |
| Signal transmission          | Bluetooth                                                                                                                                                                           |
| Size of control box          | 50 mm $\times$ 80 mm, thickness < 20 mm                                                                                                                                             |
